# Supplementary material for: Efficient one-pot synthesis of deoxyfructosazine and fructosazine fromd-glucosamine hydrochloride using a basic ionic liquid as a dual solvent-catalyst
Source: Royal Society of Chemistry journal article supplement (doi:10.1039/c4ra06832g), 2014-09-09
Supplement: c4ra06832g1.pdf [file c4ra06832g1.pdf]

SUPPLEMENTARY INFORMATION

Efficient one-pot synthesis of deoxyfructosazine and fructosazine from D-glucosamine hydrochloride under basic ionic liquid as a dual solvent-catalyst

Lingyu Jia,<sup>a,b</sup> Yingxiong Wang,<sup>a</sup> Yan Qiao,<sup>a</sup> Yongqin Qi,<sup>a</sup> Xianglin Hou<sup>\*a</sup>

<sup>a</sup> *State Key Laboratory of Coal Conversion, Institute of Coal Chemistry, Chinese*

*Academy of Sciences, 27 South Taoyuan Road, Taiyuan, 030001, PR China*

<sup>b</sup> *University of Chinese Academy of Sciences, Beijing, 100049, PR China*

*Fax: +86 351 4041153; Tel: +86 351 4049501*

*E-mail: houxl@sxicc.ac.cn*

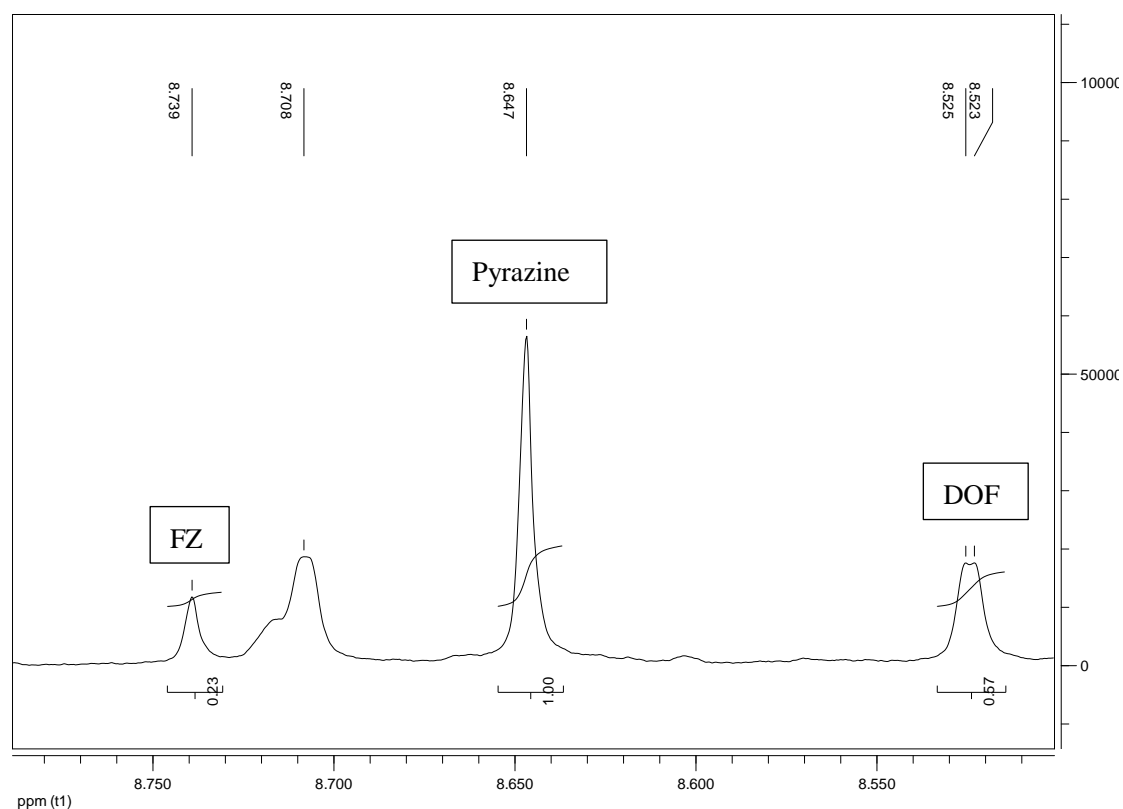

**Fig. S1.** A typical quantitative  $^1\text{H}$  NMR spectrum for the measurement of DOF and FZ yields using pyrazine as internal standard compound.

The quantitative result of products is calculated as:

$$m(x) = p(std) \frac{mw(x)}{mw(std)} \frac{nH(std)}{nH(x)} \frac{m(std)}{p(x)} \frac{A(x)}{A(std)}$$

$m(x)$  and  $m(std)$  are the masses (weights) in g,  $MW(x)$  and  $MW(std)$  are the molecular weights in g/mol,  $P(x)$  and  $P(std)$  are the purities,  $nH(x)$  and  $nH(std)$  are the number of protons generating the selected signals for integration,  $A(x)$  and  $A(std)$  are the areas for the selected peaks of the analyte and the internal standard.

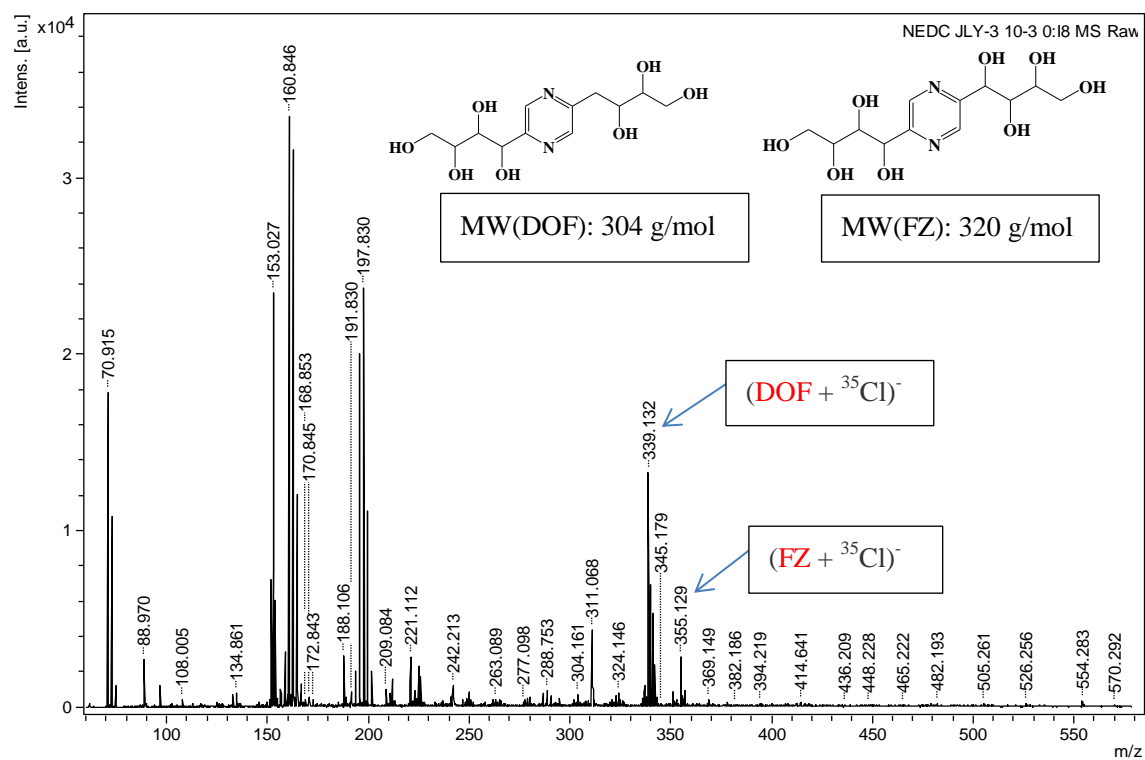

**Fig. S2.** Negative ion MALDI-TOF mass spectra of DOF and FZ using NEDC as a matrix.

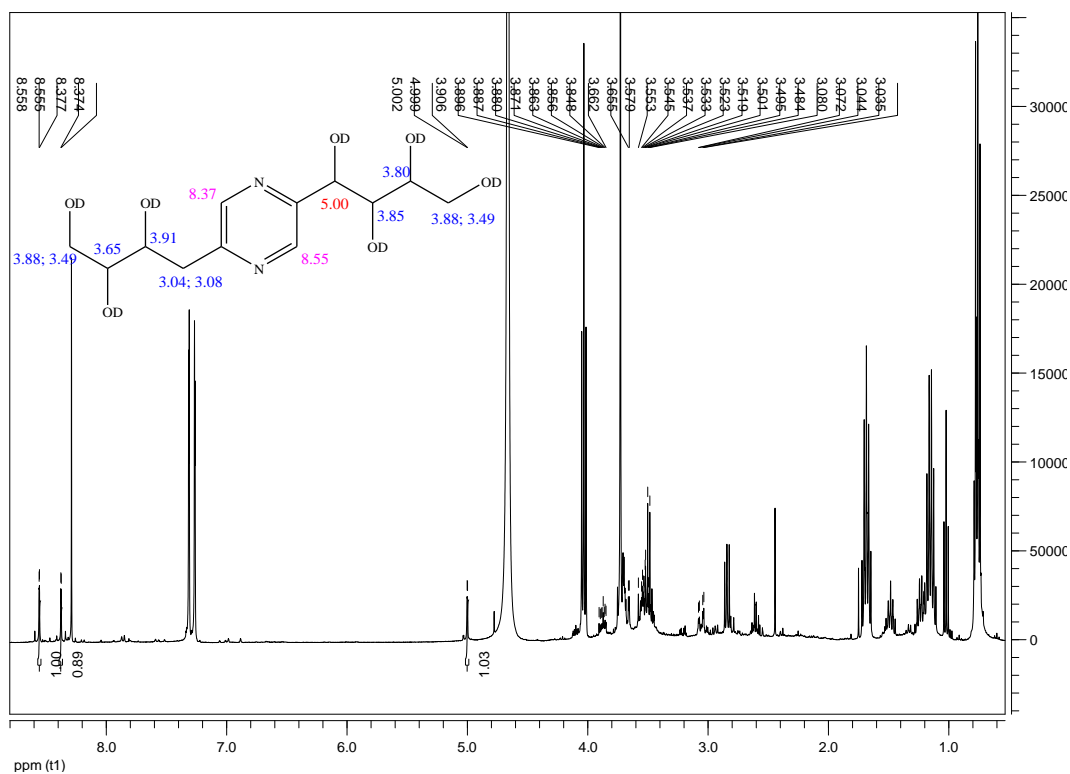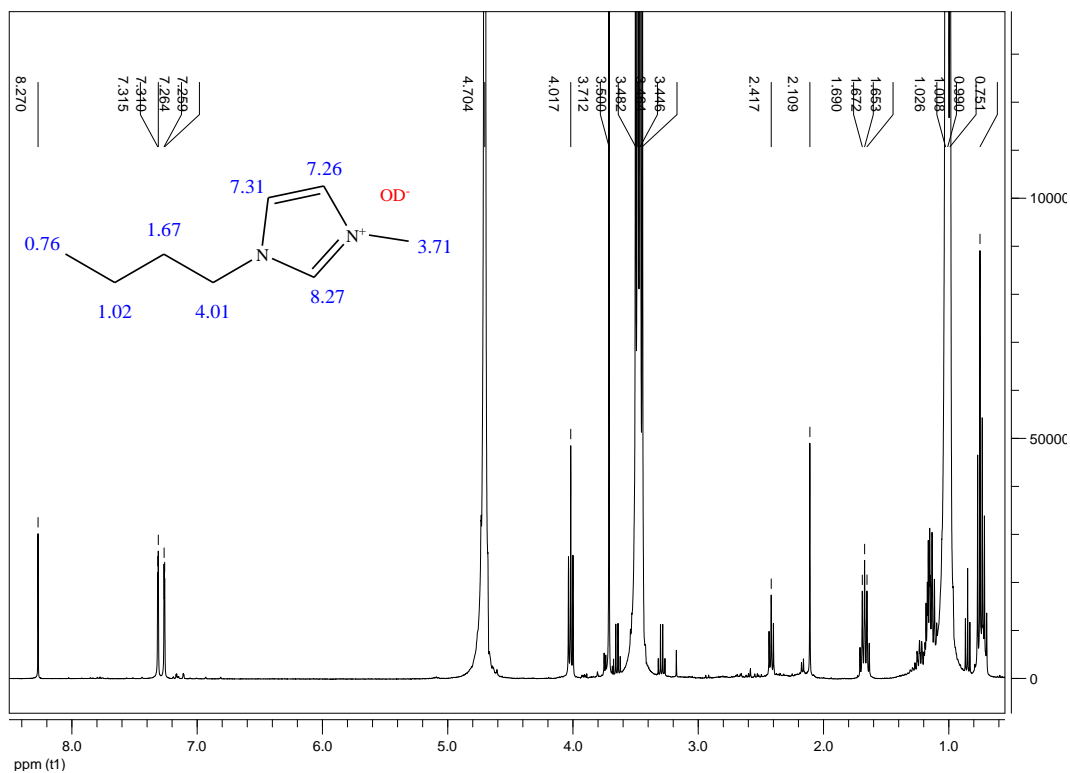

**Fig. S3.**  $^1\text{H}$  NMR spectra of products and alcoholic solution of 12% alkaline [BMIM]OH (400.13MHz,  $\text{D}_2\text{O}$ , DSS). The spectra were recorded at ambient

temperature. Chemical shifts are given in ppm. DSS was used as the internal reference.

D<sub>2</sub>O was used for the deuterium lock.

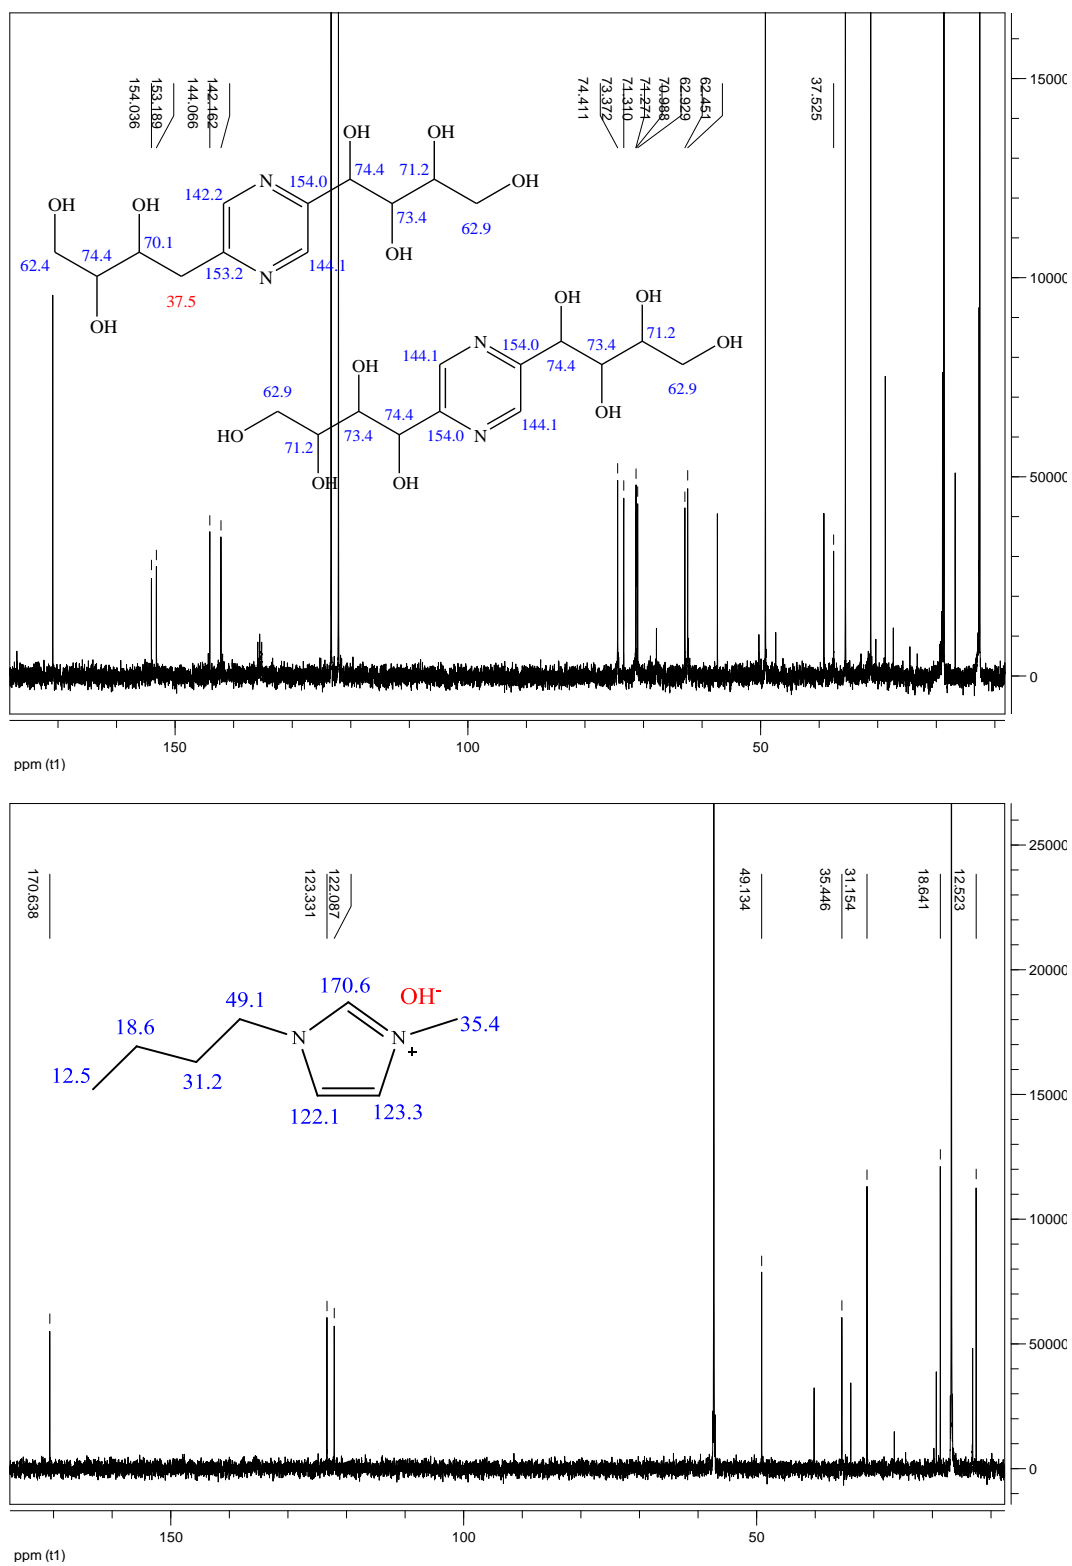

**Fig. S4.** <sup>13</sup>C NMR spectra of products and alcoholic solution of 12% alkaline [BMIM]OH (100.61MHz, D<sub>2</sub>O, DSS).

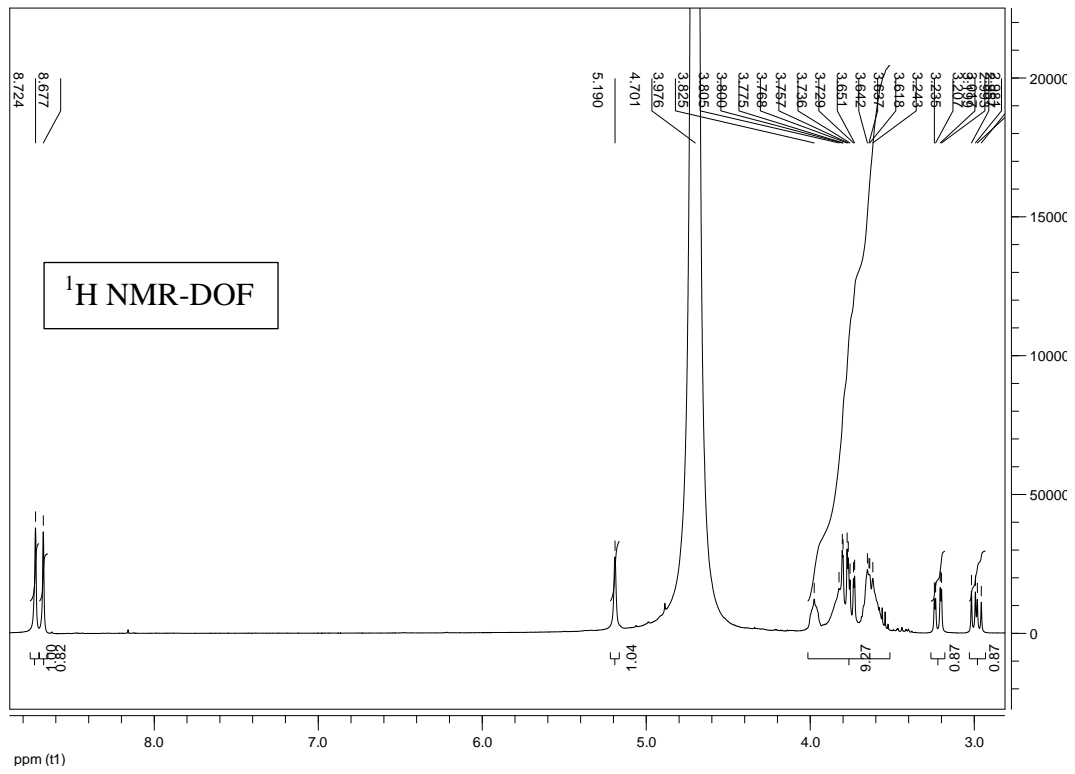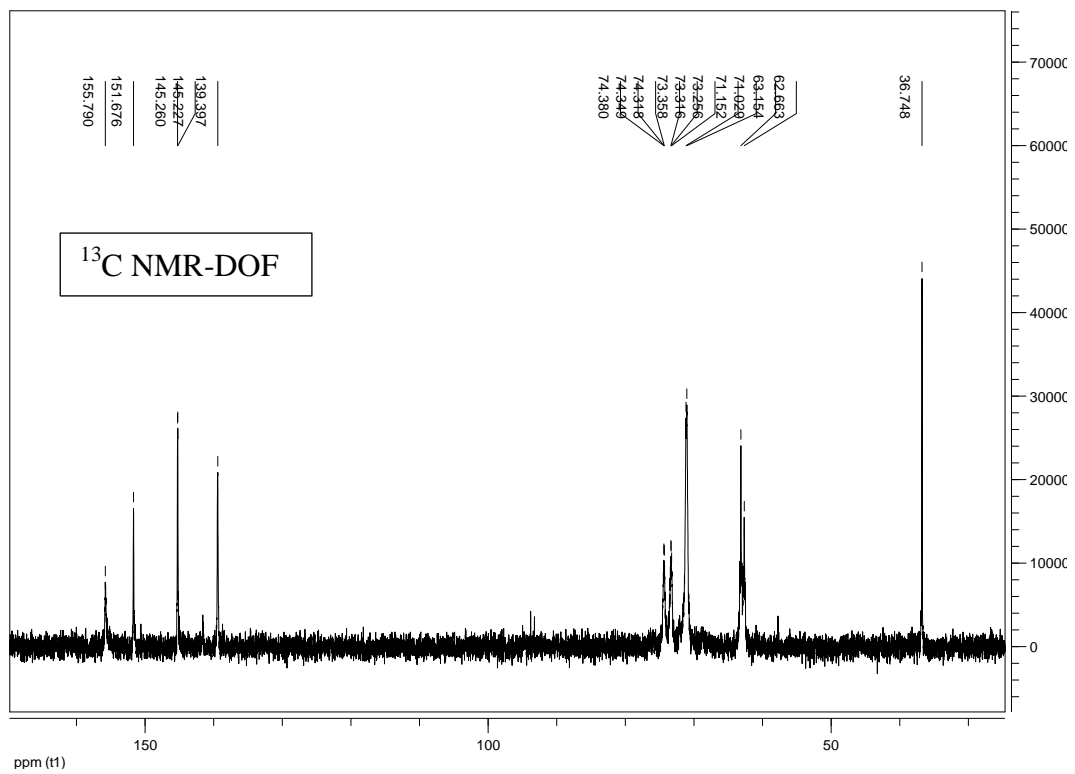

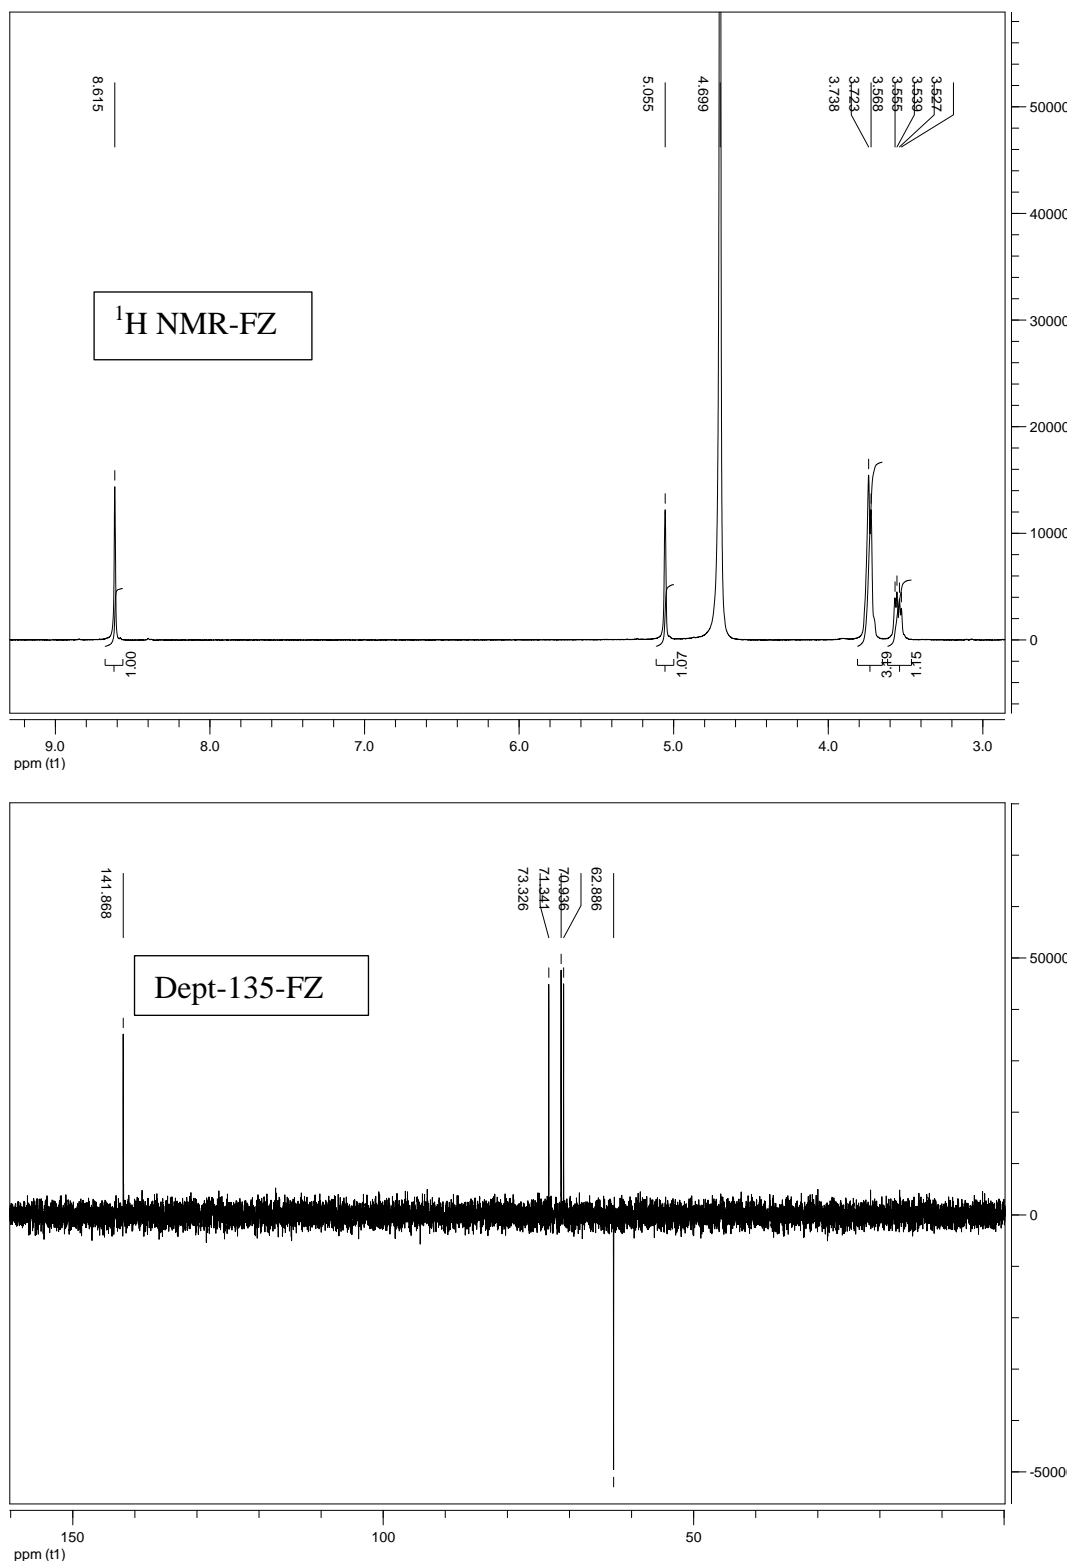

**Fig. S5.**  $^1\text{H}$  NMR and  $^{13}\text{C}$  NMR spectra of authentic sample (deoxyfructosazine, DOF and fructosazine, FZ).



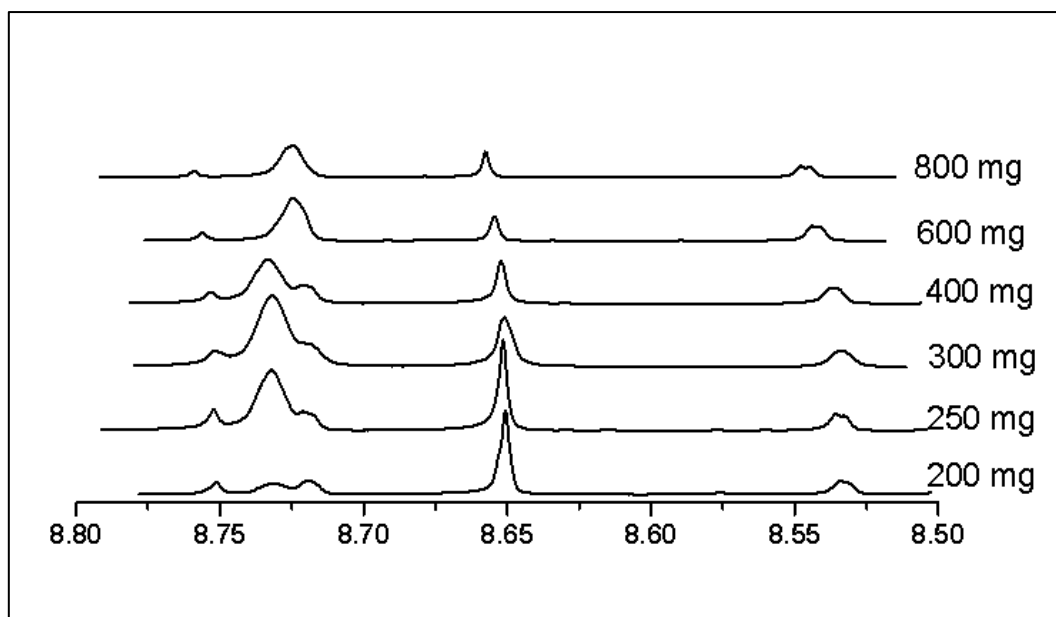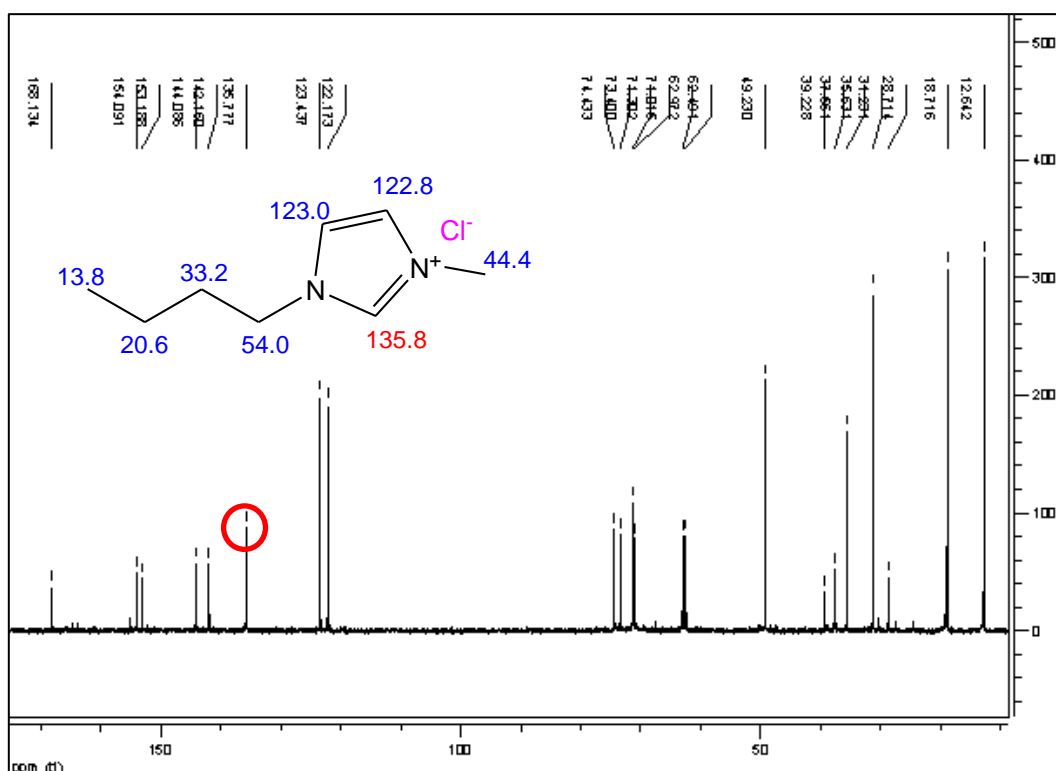

**Fig. S6.**  $^1\text{H}$  NMR and  $^{13}\text{C}$  NMR spectra of [BMIM]Cl from ion-exchange reaction between hydrochloride and the hydroxyl group of the basic ionic liquid [BMIM]OH.

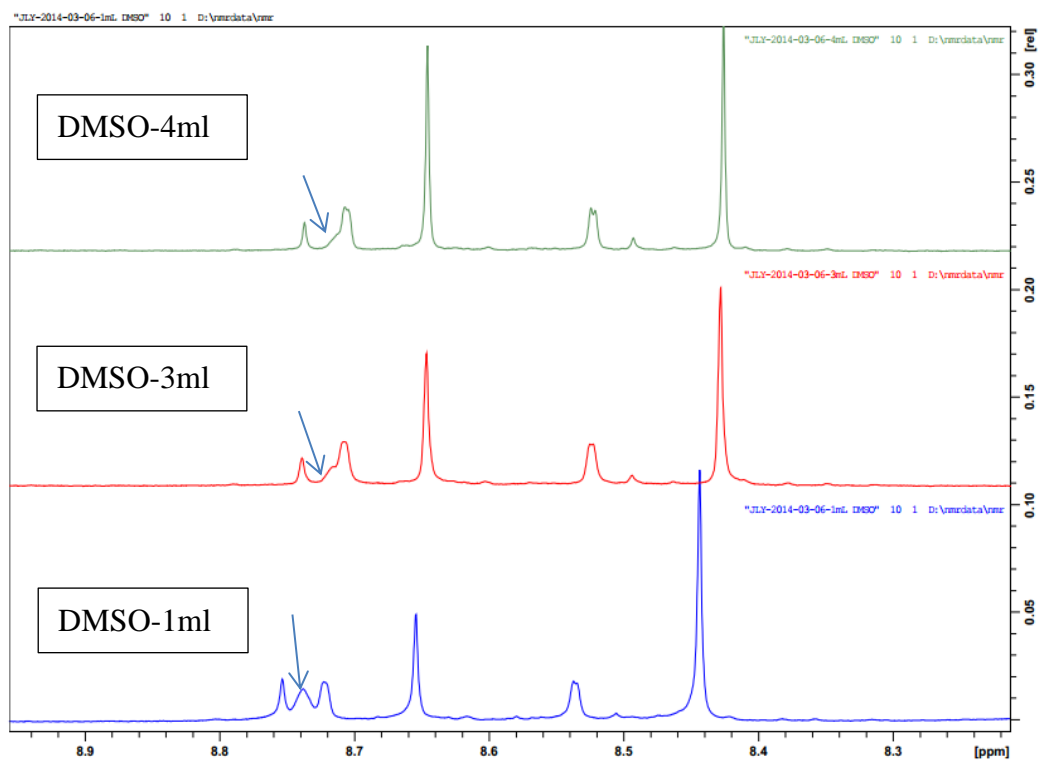

**Fig. S7.**  $^1\text{H}$  NMR spectra of products with increasing amounts of DMSO in this reaction system.
